# Supplementary material
Source: PubMed Central journal article supplement (PMC8522758)
Supplement: aac.01341-21-s0001.pdf [file aac.01341-21-s0001.pdf]

## Supplemental Appendix 1. ICD 10 Code Sets for Bacterial Infections

**Supplemental Table 1. Diagnosis Codes for Bacterial infection**

| ICD 10 Code | Description                                               | Sub-Categories         |
|-------------|-----------------------------------------------------------|------------------------|
| A00.0       | Cholera due to <i>Vibrio cholerae</i> 01, biovar cholerae | Gastrointestinal       |
| A00.1       | Cholera due to <i>Vibrio cholerae</i> 01, biovar eltor    | Gastrointestinal       |
| A00.9       | Cholera, unspecified                                      | Gastrointestinal       |
| A01.00      | Typhoid fever, unspecified                                | Gastrointestinal       |
| A01.01      | Typhoid meningitis                                        | Central nervous system |
| A01.02      | Typhoid fever with heart involvement                      |                        |
| A01.03      | Typhoid pneumonia                                         | Pneumonia/respiratory  |
| A01.04      | Typhoid arthritis                                         | Bone/joint             |
| A01.05      | Typhoid osteomyelitis                                     | Bone/joint             |
| A01.09      | Typhoid fever with other complications                    | Gastrointestinal       |
| A01.*       | Paratyphoid fever                                         | Gastrointestinal       |
| A02.0       | Salmonella enteritis                                      | Gastrointestinal       |
| A02.1       | Salmonella sepsis                                         | Sepsis                 |
| A02.20      | Localized salmonella infection, unspecified               |                        |
| A02.21      | Salmonella meningitis                                     | Central nervous system |
| A02.22      | Salmonella pneumonia                                      | Pneumonia/respiratory  |
| A02.23      | Salmonella arthritis                                      | Bone/joint             |
| A02.24      | Salmonella osteomyelitis                                  | Bone/joint             |
| A02.25      | Salmonella pyelonephritis                                 | Genitourinary          |
| A02.29      | Salmonella with other localized infection                 |                        |
| A02.8       | Other specified salmonella infections                     |                        |
| A02.9       | Salmonella infection, unspecified                         |                        |
| A03.*       | Shigellosis                                               | Gastrointestinal       |
| A04.*       | Bacterial intestinal infection                            | Gastrointestinal       |
| A20.0       | Bubonic plague                                            | Skin/soft tissue       |
| A20.1       | Cellulocutaneous plague                                   | Skin/soft tissue       |
| A20.2       | Pneumonic plague                                          | Pneumonia/respiratory  |
| A20.3       | Plague meningitis                                         | Central nervous system |
| A20.7       | Septicemic plague                                         | Sepsis                 |
| A20.8       | Other forms of plague                                     |                        |
| A20.9       | Plague, unspecified                                       |                        |
| A21.0       | Ulceroglandular tularemia                                 | Skin/soft tissue       |
| A21.1       | Oculoglandular tularemia                                  |                        |
| A21.2       | Pulmonary tularemia                                       | Pneumonia/respiratory  |
| A21.3       | Gastrointestinal tularemia                                | Gastrointestinal       |
| A21.7       | Generalized tularemia                                     | Sepsis                 |
| A21.8       | Other forms of tularemia                                  |                        |
| A21.9       | Tularemia, unspecified                                    |                        |
| A22.0       | Cutaneous anthrax                                         | Skin/soft tissue       |
| A22.1       | Pulmonary anthrax                                         | Pneumonia/respiratory  |
| A22.2       | Gastrointestinal anthrax                                  | Gastrointestinal       |
| A22.7       | Anthrax sepsis                                            | Sepsis                 |
| A22.8       | Other forms of anthrax                                    |                        |
| A22.9       | Anthrax, unspecified                                      |                        |
| A23.0       | Brucellosis due to <i>Brucella melitensis</i>             |                        |
| A23.1       | Brucellosis due to <i>Brucella abortus</i>                |                        |
| A23.2       | Brucellosis due to <i>Brucella suis</i>                   |                        |
| A23.3       | Brucellosis due to <i>Brucella canis</i>                  |                        |
| A23.8       | Other brucellosis                                         |                        |
| A23.9       | Brucellosis, unspecified                                  |                        |
| A24.0       | Glanders                                                  |                        |
| A24.1       | Acute and fulminating melioidosis                         |                        |
| A24.3       | Other melioidosis                                         |                        |
| A24.9       | Melioidosis, unspecified                                  |                        |
| A25.0       | Spirillosis                                               |                        |
| A25.1       | Streptobacillosis                                         |                        |
| A26.0       | Cutaneous erysipeloid                                     | Skin/soft tissue       |
| A26.7       | Erysipelothrix sepsis                                     | Sepsis                 |
| A26.8       | Other forms of erysipeloid                                |                        |
| A26.9       | Erysipeloid, unspecified                                  |                        |

|        |                                                               |                        |
|--------|---------------------------------------------------------------|------------------------|
| A27.0  | Leptospirosis icterohemorrhagica                              |                        |
| A27.81 | Aseptic meningitis in leptospirosis                           | Central nervous system |
| A27.89 | Other forms of leptospirosis                                  |                        |
| A28.0  | Pasteurellosis                                                |                        |
| A28.1  | Cat-scratch disease                                           | Skin/soft tissue       |
| A28.2  | Extraintestinal yersiniosis                                   |                        |
| A28.8  | Other zoonotic bacterial diseases, not elsewhere classified   |                        |
| A28.9  | Zoonotic bacterial disease, unspecified                       |                        |
| A32.0  | Cutaneous listeriosis                                         | Skin/soft tissue       |
| A32.11 | Listerial meningitis                                          | Central nervous system |
| A32.12 | Listerial meningoencephalitis                                 | Central nervous system |
| A32.7  | Listerial sepsis                                              | Sepsis                 |
| A32.81 | Oculoglandular listeriosis                                    |                        |
| A32.82 | Listerial endocarditis                                        |                        |
| A32.89 | Other forms of listeriosis                                    |                        |
| A32.9  | Listeriosis, unspecified                                      |                        |
| A34    | Obstetrical tetanus                                           |                        |
| A35    | Other tetanus                                                 |                        |
| A36.0  | Pharyngeal diphtheria                                         | Pneumonia/respiratory  |
| A36.1  | Nasopharyngeal diphtheria                                     | Pneumonia/respiratory  |
| A36.2  | Laryngeal diphtheria                                          | Pneumonia/respiratory  |
| A36.3  | Cutaneous diphtheria                                          | Skin/soft tissue       |
| A36.9  | Diphtheria, unspecified                                       |                        |
| A37.00 | Whooping cough due to Bordetella pertussis without pneumonia  | Pneumonia/respiratory  |
| A37.01 | Whooping cough due to Bordetella pertussis with pneumonia     | Pneumonia/respiratory  |
| A37.10 | Whooping cough due to Bordetella parapertussis w/o pneumonia  | Pneumonia/respiratory  |
| A37.11 | Whooping cough due to Bordetella parapertussis with pneumonia | Pneumonia/respiratory  |
| A37.80 | Whooping cough due to other Bordetella species w/o pneumonia  | Pneumonia/respiratory  |
| A37.81 | Whooping cough due to other Bordetella species with pneumonia | Pneumonia/respiratory  |
| A37.90 | Whooping cough, unspecified species without pneumonia         | Pneumonia/respiratory  |
| A37.91 | Whooping cough, unspecified species with pneumonia            | Pneumonia/respiratory  |
| A38.0  | Scarlet fever with otitis media                               |                        |
| A38.1  | Scarlet fever with myocarditis                                |                        |
| A38.8  | Scarlet fever with other complications                        |                        |
| A38.9  | Scarlet fever, uncomplicated                                  |                        |
| A39.0  | Meningococcal meningitis                                      | Central nervous system |
| A39.2  | Acute meningococcemia                                         | Sepsis                 |
| A39.4  | Meningococcemia, unspecified                                  | Sepsis                 |
| A39.50 | Meningococcal carditis, unspecified                           |                        |
| A39.51 | Meningococcal endocarditis                                    |                        |
| A39.52 | Meningococcal myocarditis                                     |                        |
| A39.53 | Meningococcal pericarditis                                    |                        |
| A39.81 | Meningococcal encephalitis                                    | Central nervous system |
| A39.82 | Meningococcal retrobulbar neuritis                            | Central nervous system |
| A39.83 | Meningococcal arthritis                                       | Bone/joint             |
| A39.89 | Other meningococcal infections                                |                        |
| A39.9  | Meningococcal infection, unspecified                          |                        |
| A40.*  | Streptococcal Sepsis                                          | Sepsis                 |
| A41.0* | Sepsis due to Methicillin susceptible Staphylococcus aureus   | Sepsis                 |
| A41.1  | Sepsis due to other specified staphylococcus                  | Sepsis                 |
| A41.2  | Sepsis due to unspecified staphylococcus                      | Sepsis                 |
| A41.3  | Sepsis due to Hemophilus influenzae                           | Sepsis                 |
| A41.4  | Sepsis due to anaerobes                                       | Sepsis                 |
| A41.5* | Gram-negative sepsis                                          | Sepsis                 |
| A41.81 | Sepsis due to Enterococcus                                    | Sepsis                 |
| A42.0  | Pulmonary actinomycosis                                       | Pneumonia/respiratory  |
| A42.1  | Abdominal actinomycosis                                       | Intra-abdominal        |
| A42.2  | Cervicofacial actinomycosis                                   |                        |
| A42.7  | Actinomycotic sepsis                                          | Sepsis                 |
| A42.81 | Actinomycotic meningitis                                      | Central nervous system |
| A42.82 | Actinomycotic encephalitis                                    | Central nervous system |
| A42.89 | Other forms of actinomycosis                                  |                        |
| A42.9  | Actinomycosis, unspecified                                    |                        |
| A43.0  | Pulmonary nocardiosis                                         | Pneumonia/respiratory  |
| A43.1  | Cutaneous nocardiosis                                         | Skin/soft tissue       |
| A43.8  | Other forms of nocardiosis                                    |                        |

|          |                                                                    |                        |
|----------|--------------------------------------------------------------------|------------------------|
| A43.9    | Nocardiosis, unspecified                                           |                        |
| A44.0    | Systemic bartonellosis                                             |                        |
| A44.1    | Cutaneous and mucocutaneous bartonellosis                          | Skin/soft tissue       |
| A44.8    | Other forms of bartonellosis                                       |                        |
| A44.9    | Bartonellosis, unspecified                                         |                        |
| A46      | Erysipelas                                                         | Skin/soft tissue       |
| A48.0    | Gas gangrene                                                       | Skin/soft tissue       |
| A48.1    | Legionnaires disease                                               | Pneumonia/respiratory  |
| A48.2    | Nonpneumonic Legionnaires disease [Pontiac fever]                  |                        |
| A48.3    | Toxic shock syndrome                                               |                        |
| A48.4    | Brazilian purpuric fever                                           |                        |
| A48.52   | Wound botulism                                                     | Skin/soft tissue       |
| A48.8    | Other specified bacterial diseases                                 |                        |
| A49.01   | Methicillin susceptible Staphylococcal infection, unspecified site |                        |
| A49.02   | Methicillin resistant Staphylococcal infection, unspecified site   |                        |
| A49.1    | Streptococcal infection, unspecified site                          |                        |
| A49.2    | Hemophilus influenzae infection, unspecified site                  |                        |
| A49.3    | Mycoplasma infection, unspecified site                             |                        |
| A49.8    | Other bacterial infections of unspecified site                     |                        |
| A49.9    | Bacterial infection, unspecified                                   |                        |
| A51.0    | Primary genital syphilis                                           | Genitourinary          |
| A51.1    | Primary anal syphilis                                              | Gastrointestinal       |
| A51.2    | Primary syphilis of other sites                                    |                        |
| A51.31   | Condyloma latum                                                    | Skin/soft tissue       |
| A51.32   | Syphilitic alopecia                                                |                        |
| A51.39   | Other secondary syphilis of skin                                   | Skin/soft tissue       |
| A51.41   | Secondary syphilitic meningitis                                    | Central nervous system |
| A51.42   | Secondary syphilitic female pelvic disease                         | Genitourinary          |
| A51.43   | Secondary syphilitic oculopathy                                    |                        |
| A51.44   | Secondary syphilitic nephritis                                     |                        |
| A51.45   | Secondary syphilitic hepatitis                                     | Intra-abdominal        |
| A51.46   | Secondary syphilitic osteopathy                                    | Bone/joint             |
| A51.49   | Other secondary syphilitic conditions                              |                        |
| A51.5    | Early syphilis, latent                                             |                        |
| A51.9    | Early syphilis, unspecified                                        |                        |
| A52.00   | Cardiovascular syphilis, unspecified                               |                        |
| A52.01   | Syphilitic aneurysm of aorta                                       |                        |
| A52.02   | Syphilitic aortitis                                                |                        |
| A52.03   | Syphilitic endocarditis                                            |                        |
| A52.04   | Syphilitic cerebral arteritis                                      | Central nervous system |
| A52.05   | Other cerebrovascular syphilis                                     | Central nervous system |
| A52.06   | Other syphilitic heart involvement                                 |                        |
| A52.09   | Other cardiovascular syphilis                                      |                        |
| A52.10   | Symptomatic neurosyphilis, unspecified                             | Central nervous system |
| A52.12   | Other cerebrospinal syphilis                                       | Central nervous system |
| A52.2    | Asymptomatic neurosyphilis                                         | Central nervous system |
| A52.3    | Neurosyphilis, unspecified                                         | Central nervous system |
| A52.72   | Syphilis of lung and bronchus                                      | Pneumonia/respiratory  |
| A52.73   | Symptomatic late syphilis of other respiratory organs              |                        |
| A52.74   | Syphilis of liver and other viscera                                | Intra-abdominal        |
| A52.75   | Syphilis of kidney and ureter                                      | Genitourinary          |
| A52.76   | Other genitourinary symptomatic late syphilis                      | Genitourinary          |
| A52.77   | Syphilis of bone and joint                                         | Bone/joint             |
| A52.78   | Syphilis of other musculoskeletal tissue                           | Skin/soft tissue       |
| A52.79   | Other symptomatic late syphilis                                    |                        |
| A52.8    | Late syphilis, latent                                              |                        |
| A52.9    | Late syphilis, unspecified                                         |                        |
| A53.0    | Latent syphilis, unspecified as early or late                      |                        |
| A53.9    | Syphilis, unspecified                                              |                        |
| A54.0-2* | Gonococcal genitourinary infection                                 | Genitourinary          |
| A54.30   | Gonococcal infection of eye, unspecified                           |                        |
| A54.31   | Gonococcal conjunctivitis                                          |                        |
| A54.32   | Gonococcal iridocyclitis                                           |                        |
| A54.33   | Gonococcal keratitis                                               |                        |
| A54.39   | Other gonococcal eye infection                                     |                        |
| A54.40   | Gonococcal infection of musculoskeletal system, unspecified        | Skin/soft tissue       |

|        |                                                                               |                        |
|--------|-------------------------------------------------------------------------------|------------------------|
| A54.42 | Gonococcal arthritis                                                          | Bone/joint             |
| A54.43 | Gonococcal osteomyelitis                                                      | Bone/joint             |
| A54.49 | Gonococcal infection of other musculoskeletal tissue                          | Skin/soft tissue       |
| A54.5  | Gonococcal pharyngitis                                                        | Pneumonia/respiratory  |
| A54.6  | Gonococcal infection of anus and rectum                                       | Gastrointestinal       |
| A54.81 | Gonococcal meningitis                                                         | Central nervous system |
| A54.82 | Gonococcal brain abscess                                                      | Central nervous system |
| A54.83 | Gonococcal heart infection                                                    |                        |
| A54.84 | Gonococcal pneumonia                                                          | Pneumonia/respiratory  |
| A54.85 | Gonococcal peritonitis                                                        | Intra-abdominal        |
| A54.86 | Gonococcal sepsis                                                             | Sepsis                 |
| A54.89 | Other gonococcal infections                                                   |                        |
| A54.9  | Gonococcal infection, unspecified                                             |                        |
| A55    | Chlamydial lymphogranuloma (venereum)                                         | Genitourinary          |
| A56.0* | Chlamydial infection of lower genitourinary tract                             | Genitourinary          |
| A56.11 | Chlamydial female pelvic inflammatory disease                                 | Genitourinary          |
| A56.19 | Other chlamydial genitourinary infection                                      | Genitourinary          |
| A56.2  | Chlamydial infection of genitourinary tract, unspecified                      | Genitourinary          |
| A56.3  | Chlamydial infection of anus and rectum                                       | Gastrointestinal       |
| A56.4  | Chlamydial infection of pharynx                                               | Pneumonia/respiratory  |
| A56.8  | Sexually transmitted chlamydial infection of other sites                      | Genitourinary          |
| A57    | Chancroid                                                                     | Genitourinary          |
| A58    | Granuloma inguinale                                                           | Genitourinary          |
| A68.0  | Louse-borne relapsing fever                                                   |                        |
| A68.1  | Tick-borne relapsing fever                                                    |                        |
| A69.20 | Lyme disease, unspecified                                                     |                        |
| A69.21 | Meningitis due to Lyme disease                                                | Central nervous system |
| A69.98 | Other specified spirochetal infections                                        |                        |
| A69.9  | Spirochetal infection, unspecified                                            |                        |
| A70    | Chlamydia psittaci infections                                                 |                        |
| A71.0  | Initial stage of trachoma                                                     |                        |
| A71.1  | Active stage of trachoma                                                      |                        |
| A71.9  | Trachoma, unspecified                                                         |                        |
| A74.0  | Chlamydial conjunctivitis                                                     |                        |
| A74.81 | Chlamydial peritonitis                                                        | Intra-abdominal        |
| A74.89 | Other chlamydial diseases                                                     |                        |
| A74.9  | Chlamydial infection, unspecified                                             |                        |
| A75.*  | Rickettsial infections                                                        |                        |
| A77.*  | Spotted fever and ehrlichiosis                                                |                        |
| A78    | Q fever                                                                       |                        |
| A79.*  | Other Rickettsioses                                                           |                        |
| B95.0  | Streptococcus, group A, causing diseases classified elsewhere                 |                        |
| B95.1  | Streptococcus, group B, causing diseases classified elsewhere                 |                        |
| B95.2  | Enterococcus as the cause of diseases classified elsewhere                    |                        |
| B95.3  | Streptococcus pneumoniae causing diseases classified elsewhere                |                        |
| B95.4  | Other streptococcus as the cause of diseases classified elsewhere             |                        |
| B95.5  | Unspecified streptococcus as the cause of diseases classified elsewhere       |                        |
| B95.61 | Methicillin susceptible staph infection causing diseases classified elsewhere |                        |
| B95.62 | Methicillin resistant staph infection causing diseases classified elsewhere   |                        |
| B95.7  | Other staphylococcus as the cause of diseases classified elsewhere            |                        |
| B95.8  | Unspecified staphylococcus as the cause of diseases classified elsewhere      |                        |
| B96.0  | Mycoplasma pneumoniae as the cause of diseases classified elsewhere           |                        |
| B96.1  | Klebsiella pneumoniae as the cause of diseases classified elsewhere           |                        |
| B96.20 | Unspecified Escherichia coli as the cause of diseases classified elsewhere    |                        |
| B96.21 | Shiga toxin E coli (STEC) O157 causing diseases classified elsewhere          |                        |
| B96.22 | Other shiga toxin E coli (STEC) causing diseases classified elsewhere         |                        |
| B96.23 | Unspecified shiga toxin E coli (STEC) causing diseases classified elsewhere   |                        |
| B96.29 | Other Escherichia coli as the cause of diseases classified elsewhere          |                        |
| B96.3  | Hemophilus influenzae as the cause of diseases classified elsewhere           |                        |
| B96.4  | Proteus (mirabilis) (morganii) causing diseases classified elsewhere          |                        |
| B96.5  | Pseudomonas (mallei) causing diseases classified elsewhere                    |                        |
| B96.6  | Bacteroides fragilis as the cause of diseases classified elsewhere            |                        |
| B96.7  | Clostridium perfringens causing diseases classified elsewhere                 |                        |
| B96.81 | Helicobacter pylori as the cause of diseases classified elsewhere             |                        |
| B96.82 | Vibrio vulnificus as the cause of diseases classified elsewhere               |                        |
| B96.89 | Other bacterial agents as the cause of diseases classified elsewhere          |                        |

|         |                                                                                 |                        |
|---------|---------------------------------------------------------------------------------|------------------------|
| D73.3   | Abscess of spleen                                                               | Intra-abdominal        |
| G0.0*   | Bacterial meningitis                                                            | Central nervous system |
| G01     | Meningitis in bacterial diseases classified elsewhere                           | Central nervous system |
| G04.2   | Bacterial meningoencephalitis and meningomyelitis, not elsewhere classified     | Central nervous system |
| G06.0   | Intracranial abscess and granuloma                                              | Central nervous system |
| G06.1   | Intraspinal abscess and granuloma                                               | Central nervous system |
| G06.2   | Extradural and subdural abscess, unspecified                                    | Central nervous system |
| H05.01* | Cellulitis of orbit                                                             | Skin/soft tissue       |
| H05.02* | Osteomyelitis of orbit                                                          | Bone/joint             |
| H60.0*  | Abscess of external ear                                                         | Skin/soft tissue       |
| H60.1*  | Cellulitis of external ear                                                      | Skin/soft tissue       |
| H60.2*  | Malignant otitis externa                                                        | Skin/soft tissue       |
| H66.0*  | Acute suppurative otitis media                                                  | Pneumonia/respiratory  |
| H70.0*  | Acute mastoiditis                                                               | Pneumonia/respiratory  |
| H70.2*  | Acute petrositis                                                                | Pneumonia/respiratory  |
| I33.0   | Acute and subacute infective endocarditis                                       |                        |
| I33.9   | Acute and subacute endocarditis, unspecified                                    |                        |
| I76     | Septic arterial embolism                                                        |                        |
| J02.0   | Streptococcal pharyngitis                                                       | Pneumonia/respiratory  |
| J03.00  | Acute streptococcal tonsillitis, unspecified                                    | Pneumonia/respiratory  |
| J03.01  | Acute recurrent streptococcal tonsillitis                                       | Pneumonia/respiratory  |
| J13     | Pneumonia due to Streptococcus pneumoniae                                       | Pneumonia/respiratory  |
| J14     | Pneumonia due to Hemophilus influenzae                                          | Pneumonia/respiratory  |
| J15.*   | Bacterial pneumonia                                                             | Pneumonia/respiratory  |
| J16.0   | Chlamydial pneumonia                                                            | Pneumonia/respiratory  |
| J18.1   | Lobar pneumonia, unspecified organism                                           | Pneumonia/respiratory  |
| J20.0   | Acute bronchitis due to Mycoplasma pneumoniae                                   | Pneumonia/respiratory  |
| J20.1   | Acute bronchitis due to Hemophilus influenzae                                   | Pneumonia/respiratory  |
| J20.2   | Acute bronchitis due to streptococcus                                           | Pneumonia/respiratory  |
| J36     | Peritonsillar abscess                                                           | Pneumonia/respiratory  |
| J39.0   | Retropharyngeal and parapharyngeal abscess                                      | Pneumonia/respiratory  |
| J39.1   | Other abscess of pharynx                                                        | Pneumonia/respiratory  |
| J85.1   | Abscess of lung with pneumonia                                                  | Pneumonia/respiratory  |
| J85.2   | Abscess of lung without pneumonia                                               | Pneumonia/respiratory  |
| J85.3   | Abscess of mediastinum                                                          |                        |
| J86.*   | Pyothorax                                                                       |                        |
| J95.851 | Ventilator associated pneumonia                                                 | Pneumonia/respiratory  |
| K12.2   | Cellulitis and abscess of mouth                                                 |                        |
| K22.3   | Perforation of esophagus                                                        |                        |
| K25.1   | Acute gastric ulcer with perforation                                            | Intra-abdominal        |
| K25.2   | Acute gastric ulcer with both hemorrhage and perforation                        | Intra-abdominal        |
| K26.1   | Acute duodenal ulcer with perforation                                           | Intra-abdominal        |
| K26.2   | Acute duodenal ulcer with both hemorrhage and perforation                       | Intra-abdominal        |
| K27.1   | Acute peptic ulcer, site unspecified, with perforation                          | Intra-abdominal        |
| K27.2   | Acute peptic ulcer, site unspecified, w both hemorrhage and perf                | Intra-abdominal        |
| K28.1   | Acute gastrojejunal ulcer with perforation                                      | Intra-abdominal        |
| K28.2   | Acute gastrojejunal ulcer w both hemorrhage and perforation                     | Intra-abdominal        |
| K35*    | Acute appendicitis                                                              | Intra-abdominal        |
| K50.014 | Crohns disease of small intestine with abscess                                  | Intra-abdominal        |
| K50.114 | Crohns disease of large intestine with abscess                                  | Intra-abdominal        |
| K50.814 | Crohns disease of both small and large intestine with abscess                   | Intra-abdominal        |
| K50.914 | Crohns disease, unspecified, with abscess                                       | Intra-abdominal        |
| K51.014 | Ulcerative (chronic) pancolitis with abscess                                    | Intra-abdominal        |
| K51.214 | Ulcerative (chronic) proctitis with abscess                                     | Intra-abdominal        |
| K51.314 | Ulcerative (chronic) rectosigmoiditis with abscess                              | Intra-abdominal        |
| K51.414 | Inflammatory polyps of colon with abscess                                       | Intra-abdominal        |
| K51.514 | Left sided colitis with abscess                                                 | Intra-abdominal        |
| K51.814 | Other ulcerative colitis with abscess                                           | Intra-abdominal        |
| K51.914 | Ulcerative colitis, unspecified with abscess                                    | Intra-abdominal        |
| K57.00  | Diverticulitis of small intestine with perforation and abscess without bleeding | Intra-abdominal        |
| K57.01  | Diverticulitis of small intestine with perforation and abscess with bleeding    | Intra-abdominal        |
| K57.13  | Diverticulitis of small intestine without perforation or abscess with bleeding  | Intra-abdominal        |
| K57.20  | Diverticulitis of large intestine with perforation and abscess without bleeding | Intra-abdominal        |
| K57.21  | Diverticulitis of large intestine with perforation and abscess with bleeding    | Intra-abdominal        |
| K57.33  | Diverticulitis of large intestine without perforation or abscess with bleeding  | Intra-abdominal        |

|        |                                                                                                |                  |
|--------|------------------------------------------------------------------------------------------------|------------------|
| K57.40 | Diverticulitis of both small and large intestine with perforation and abscess without bleeding | Intra-abdominal  |
| K57.41 | Diverticulitis of both small and large intestine with perforation and abscess with bleeding    | Intra-abdominal  |
| K57.53 | Diverticulitis of both small and large intestine without perforation or abscess with bleeding  | Intra-abdominal  |
| K57.80 | Diverticulitis of intestine, part unspecified, with perforation and abscess without bleeding   | Intra-abdominal  |
| K57.81 | Diverticulitis of intestine, part unspecified, with perforation and abscess with bleeding      | Intra-abdominal  |
| K57.93 | Diverticulitis of intestine, part unspecified, without perforation or abscess with bleeding    | Intra-abdominal  |
| K61.*  | Ischiorectal abscess                                                                           | Intra-abdominal  |
| K63.0  | Abscess of intestine                                                                           | Intra-abdominal  |
| K65.0  | Generalized (acute) peritonitis                                                                | Intra-abdominal  |
| K65.1  | Peritoneal abscess                                                                             | Intra-abdominal  |
| K65.2  | Spontaneous bacterial peritonitis                                                              | Intra-abdominal  |
| K65.3  | Choleperitonitis                                                                               | Intra-abdominal  |
| K68.11 | Postprocedural retroperitoneal abscess                                                         | Skin/soft tissue |
| K68.12 | Psoas muscle abscess                                                                           | Skin/soft tissue |
| K68.19 | Other retroperitoneal abscess                                                                  | Skin/soft tissue |
| K75.0  | Abscess of liver                                                                               | Intra-abdominal  |
| K80.00 | Calculus of gallbladder w acute cholecystitis w/o obstruction                                  | Intra-abdominal  |
| K80.01 | Calculus of gallbladder w acute cholecystitis w obstruction                                    | Intra-abdominal  |
| K80.12 | Calculus of GB w acute and chronic cholecystitis w/o obstruction                               | Intra-abdominal  |
| K80.13 | Calculus of GB w acute and chronic cholecystitis w obstruction                                 | Intra-abdominal  |
| K80.32 | Calculus of bile duct with acute cholangitis w/o obstruction                                   | Intra-abdominal  |
| K80.33 | Calculus of bile duct w acute cholangitis with obstruction                                     | Intra-abdominal  |
| K80.36 | Calculus of bile duct w acute and chronic cholangitis w/o obstruction                          | Intra-abdominal  |
| K80.37 | Calculus of bile duct w acute and chronic cholangitis w obstruction                            | Intra-abdominal  |
| K80.42 | Calculus of bile duct w acute cholecystitis w/o obstruction                                    | Intra-abdominal  |
| K80.43 | Calculus of bile duct w acute cholecystitis with obstruction                                   | Intra-abdominal  |
| K80.46 | Calculus of bile duct w acute and chronic cholecystitis w/o obstruction                        | Intra-abdominal  |
| K80.47 | Calculus of bile duct w acute and chronic cholecystitis w obstruction                          | Intra-abdominal  |
| K80.62 | Calculus of GB and bile duct w acute cholecystitis w/o obstruction                             | Intra-abdominal  |
| K80.63 | Calculus of GB and bile duct w acute cholecystitis w obstruction                               | Intra-abdominal  |
| K80.66 | Calculus of GB and bile duct w ac and chronic cholecystitis w/o obstruction                    | Intra-abdominal  |
| K80.67 | Calculus of GB and bile duct w ac and chronic cholecystitis w obstruction                      | Intra-abdominal  |
| K81.0  | Acute cholecystitis                                                                            | Intra-abdominal  |
| K81.2  | Acute cholecystitis with chronic cholecystitis                                                 | Intra-abdominal  |
| K82.2  | Perforation of gallbladder                                                                     | Intra-abdominal  |
| K82.A1 | Gangrene of gallbladder in cholecystitis                                                       | Intra-abdominal  |
| K82.A2 | Perforation of gallbladder in cholecystitis                                                    | Intra-abdominal  |
| K83.0  | Cholangitis                                                                                    | Intra-abdominal  |
| K83.2  | Perforation of bile duct                                                                       | Intra-abdominal  |
| L00    | Staphylococcal scalded skin syndrome                                                           | Skin/soft tissue |
| L01.0* | Impetigo                                                                                       | Skin/soft tissue |
| L01.1  | Impetiginization of other dermatoses                                                           | Skin/soft tissue |
| L02.*  | Cutaneous abscess / furuncle / carbuncle                                                       | Skin/soft tissue |
| L03.*  | Cellulitis / acute lymphangitis                                                                | Skin/soft tissue |
| L04.*  | Acute lymphadenitis                                                                            | Skin/soft tissue |
| L05.01 | Pilonidal cyst with abscess                                                                    | Skin/soft tissue |
| L05.02 | Pilonidal sinus with abscess                                                                   | Skin/soft tissue |
| M00.0* | Staphylococcal arthritis                                                                       | Bone/joint       |
| M00.1* | Pneumococcal arthritis                                                                         | Bone/joint       |
| M00.2* | Other streptococcal arthritis, unspecified joint                                               | Bone/joint       |
| M00.8* | Arthritis due to other bacteria, unspecified joint                                             | Bone/joint       |
| M00.9  | Pyogenic arthritis, unspecified                                                                | Bone/joint       |
| M46.2* | Osteomyelitis of vertebra                                                                      | Bone/joint       |
| M46.3* | Infection of intervertebral disc (pyogenic)                                                    | Bone/joint       |
| M65.0* | Abscess of tendon sheath                                                                       | Skin/soft tissue |
| M71.0* | Abscess of bursa                                                                               | Skin/soft tissue |
| M72.6  | Necrotizing fasciitis                                                                          | Skin/soft tissue |
| M86.0* | Acute hematogenous osteomyelitis                                                               | Bone/joint       |
| M86.1* | Other acute osteomyelitis                                                                      | Bone/joint       |
| M86.2* | Subacute osteomyelitis                                                                         | Bone/joint       |
| N10    | Acute pyelonephritis                                                                           | Genitourinary    |
| N13.6  | Pyonephrosis                                                                                   | Genitourinary    |
| N15.1  | Renal and perinephric abscess                                                                  | Genitourinary    |
| N30.00 | Acute cystitis without hematuria                                                               | Genitourinary    |
| N30.01 | Acute cystitis with hematuria                                                                  | Genitourinary    |

|          |                                                                                |                  |
|----------|--------------------------------------------------------------------------------|------------------|
| N34.0    | Urethral abscess                                                               | Genitourinary    |
| N39.0    | Urinary tract infection, site not specified                                    | Genitourinary    |
| N41.0    | Acute prostatitis                                                              | Genitourinary    |
| N41.2    | Abscess of prostate                                                            | Genitourinary    |
| N41.3    | Prostatocystitis                                                               | Genitourinary    |
| N43.1    | Infected hydrocele                                                             | Genitourinary    |
| N45.1    | Epididymitis                                                                   | Genitourinary    |
| N45.4    | Abscess of epididymis or testis                                                | Genitourinary    |
| N48.21   | Abscess of corpus cavernosum and penis                                         | Genitourinary    |
| N48.22   | Cellulitis of corpus cavernosum and penis                                      | Genitourinary    |
| N49.3    | Fournier gangrene                                                              | Genitourinary    |
| N61.0    | Mastitis without abscess                                                       | Skin/soft tissue |
| N61.1    | Abscess of the breast and nipple                                               | Skin/soft tissue |
| N70.01   | Acute salpingitis                                                              | Genitourinary    |
| N70.02   | Acute oophoritis                                                               | Genitourinary    |
| N70.03   | Acute salpingitis and oophoritis                                               | Genitourinary    |
| N73.0    | Acute parametritis and pelvic cellulitis                                       | Skin/soft tissue |
| N73.3    | Female acute pelvic peritonitis                                                | Intra-abdominal  |
| N75.1    | Abscess of Bartholins gland                                                    | Genitourinary    |
| N76.4    | Abscess of vulva                                                               | Genitourinary    |
| N99.511  | Cystostomy infection                                                           | Genitourinary    |
| N99.521  | Infection of incontinent external stoma of urinary tract                       | Genitourinary    |
| O03.37   | Sepsis following incomplete spontaneous abortion                               | Sepsis           |
| O03.38   | Urinary tract infection following incomplete spontaneous abortion              | Genitourinary    |
| O03.87   | Sepsis following complete or unspecified spontaneous abortion                  | Sepsis           |
| O03.88   | Urinary tract infection following complete or unspecified spontaneous abortion | Genitourinary    |
| O04.87   | Sepsis following (induced) termination of pregnancy                            | Sepsis           |
| O04.88   | Urinary tract infection following (induced) term of pregnancy                  | Genitourinary    |
| O07.0    | Genital tract and pelvic infection following failed attempt term of pregnancy  | Genitourinary    |
| O07.37   | Sepsis following failed attempted termination of pregnancy                     | Sepsis           |
| O07.38   | Urinary tract infection following failed attempt term of pregnancy             | Genitourinary    |
| O08.0    | Genital tract and pelvic infection following ectopic and molar pregnancy       | Genitourinary    |
| O08.82   | Sepsis following ectopic and molar pregnancy                                   | Sepsis           |
| O08.83   | Urinary tract infection following an ectopic and molar pregnancy               | Genitourinary    |
| O23.0*   | Infections of kidney in pregnancy                                              | Genitourinary    |
| O23.1*   | Infections of bladder in pregnancy                                             | Genitourinary    |
| O23.2*   | Infections of urethra in pregnancy                                             | Genitourinary    |
| O23.3*   | Infections of other parts of urinary tract in pregnancy                        | Genitourinary    |
| O23.52*  | Salpingo-oophoritis in pregnancy                                               | Genitourinary    |
| O23.59*  | Infection of other part of genital tract in pregnancy, first trimester         | Genitourinary    |
| O41.112* | Chorioamnionitis                                                               | Intra-abdominal  |
| O85      | Puerperal sepsis                                                               | Sepsis           |
| O86.00-2 | Infection of obstetric surgical wound                                          | Skin/soft tissue |
| O86.03   | Infection of obstetric surgical wound, organ and space site                    | Intra-abdominal  |
| O86.04   | Sepsis following an obstetrical procedure                                      | Sepsis           |
| O86.12   | Endometritis following delivery                                                | Genitourinary    |
| O86.2    | Urinary tract infection following delivery                                     | Genitourinary    |
| O86.81   | Puerperal septic thrombophlebitis                                              |                  |
| O88.3    | Pyemic and septic embolism in pregnancy                                        |                  |
| O91.11*  | Abscess of breast associated with pregnancy, first trimester                   | Skin/soft tissue |
| O98.1*   | Syphilis complicating pregnancy or childbirth                                  |                  |
| O98.2    | Gonorrhea complicating pregnancy or childbirth                                 |                  |
| T81.41*  | Infection following a procedure, superficial incisional surgical site          | Skin/soft tissue |
| T81.42*  | Infection following a procedure, deep incisional surgical site                 | Skin/soft tissue |
| T81.43*  | Infection following a procedure, organ and space incisional surgical site      | Skin/soft tissue |

**Supplemental Table 2. Non-Specific Diagnosis Codes for Sepsis or Pneumonia**

| <b>ICD 10 Code</b> | <b>Description</b>                                    |
|--------------------|-------------------------------------------------------|
| A41.89             | Other specified sepsis                                |
| A41.9              | Sepsis, unspecified organism                          |
| J16.8              | Pneumonia due to other specified infectious organisms |
| J17                | Pneumonia in diseases classified elsewhere            |
| J18.8              | Other pneumonia, unspecified organism                 |
| J18.9              | Pneumonia, unspecified organism                       |
| R65.20             | Severe sepsis without septic shock                    |
| R65.21             | Severe sepsis with septic shock                       |
| T81.44XA           | Sepsis following a procedure, initial encounter       |



**Supplemental Table 3. Patient and Hospital Variables Associated with Bacterial Co-Infection POA**

|                                            | aRR* | 95% CI |      | p-value |
|--------------------------------------------|------|--------|------|---------|
|                                            |      | LL     | UL   |         |
| Age                                        | 1.01 | 1.01   | 1.01 | < 0.001 |
| Male                                       | 0.82 | 0.79   | 0.85 | < 0.001 |
| Hospital Transfer                          | 1.18 | 1.10   | 1.26 | < 0.001 |
| Admission from long-term care              | 1.40 | 1.31   | 1.49 | < 0.001 |
| Black race                                 | 0.92 | 0.88   | 0.96 | < 0.001 |
| Hispanic ethnicity                         | 0.89 | 0.84   | 0.94 | < 0.001 |
| Urban hospital                             | 0.96 | 0.87   | 1.05 | 0.359   |
| Bed size category                          | 1.01 | 0.99   | 1.03 | 0.333   |
| Northeast region                           | 0.98 | 0.91   | 1.06 | 0.621   |
| % COVID-19 admissions                      | 0.99 | 0.99   | 1.00 | < 0.001 |
| % Admissions with mechanical ventilation   | 1.01 | 1.00   | 1.01 | 0.043   |
| <i>Elixhauser Comorbidities:</i>           |      |        |      |         |
| - Valvular heart disease                   | 0.93 | 0.85   | 1.01 | 0.077   |
| - Pulmonary circulation disease            | 1.12 | 0.99   | 1.26 | 0.082   |
| - Peripheral vascular disease              | 1.16 | 1.08   | 1.25 | < 0.001 |
| - Hypertension, uncomplicated              | 0.91 | 0.88   | 0.95 | < 0.001 |
| - Hypertension, complicated                | 1.12 | 1.07   | 1.18 | < 0.001 |
| - Paralysis                                | 1.51 | 1.38   | 1.64 | < 0.001 |
| - Neurologic disorders                     | 1.24 | 1.19   | 1.30 | < 0.001 |
| - Chronic lung disease                     | 0.98 | 0.94   | 1.02 | 0.310   |
| - Diabetes mellitus, uncomplicated         | 1.01 | 0.96   | 1.06 | 0.667   |
| - Diabetes mellitus, complicated           | 1.14 | 1.09   | 1.19 | < 0.001 |
| - Hypothyroidism                           | 1.06 | 1.01   | 1.11 | 0.016   |
| - Renal failure                            | 1.05 | 0.99   | 1.11 | 0.081   |
| - Liver disease                            | 1.17 | 1.08   | 1.26 | < 0.001 |
| - Peptic ulcer disease                     | 1.19 | 1.03   | 1.37 | 0.019   |
| - HIV / AIDS                               | 0.97 | 0.70   | 1.34 | 0.848   |
| - Lymphoma                                 | 1.05 | 0.86   | 1.27 | 0.659   |
| - Metastatic malignancy                    | 1.13 | 0.95   | 1.34 | 0.163   |
| - Solid tumor                              | 1.02 | 0.91   | 1.15 | 0.682   |
| - Rheumatoid arthritis / collagen-vascular | 1.11 | 1.02   | 1.21 | 0.014   |
| - Coagulopathy                             | 1.17 | 1.11   | 1.24 | < 0.001 |
| - Obesity                                  | 1.05 | 1.00   | 1.09 | 0.053   |
| - Weight loss                              | 1.35 | 1.28   | 1.41 | < 0.001 |
| - Fluid and electrolyte disorders          | 1.31 | 1.26   | 1.36 | < 0.001 |
| - Blood loss anemia                        | 1.03 | 0.87   | 1.23 | 0.704   |
| - Deficiency anemia                        | 1.27 | 1.22   | 1.32 | 0.000   |
| - Alcohol abuse                            | 1.05 | 0.94   | 1.17 | 0.387   |
| - Substance use disorder                   | 1.22 | 1.08   | 1.38 | 0.001   |
| - Psychoses                                | 1.17 | 1.11   | 1.24 | < 0.001 |
| - Depression                               | 1.07 | 1.02   | 1.13 | 0.004   |

\* All covariates included in the model are included in this table. Risk ratios are adjusted based on listed covariates.

**Supplemental Table 4. Patient and Hospital Variables Associated with Bacterial Secondary Infection not POA**

|                                            | aRR* | 95% CI |      | p-value |
|--------------------------------------------|------|--------|------|---------|
|                                            |      | LL     | UL   |         |
| Age                                        | 1.00 | 1.00   | 1.01 | 0.026   |
| Male                                       | 1.18 | 1.09   | 1.28 | < 0.001 |
| Hospital Transfer                          | 1.68 | 1.40   | 2.01 | < 0.001 |
| Admission from long-term care              | 0.75 | 0.60   | 0.95 | 0.016   |
| Black race                                 | 0.88 | 0.79   | 0.97 | 0.014   |
| Hispanic ethnicity                         | 1.12 | 1.00   | 1.25 | 0.049   |
| Urban hospital                             | 0.83 | 0.66   | 1.05 | 0.130   |
| Bed size category                          | 1.11 | 1.06   | 1.16 | < 0.001 |
| Northeast region                           | 1.06 | 0.89   | 1.26 | 0.529   |
| % COVID-19 admissions                      | 1.00 | 0.99   | 1.00 | 0.132   |
| % Admissions with mechanical ventilation   | 1.06 | 1.05   | 1.07 | < 0.001 |
| <i>Elixhauser Comorbidities:</i>           |      |        |      |         |
| - Valvular heart disease                   | 1.11 | 0.90   | 1.38 | 0.317   |
| - Pulmonary circulation disease            | 0.98 | 0.76   | 1.27 | 0.893   |
| - Peripheral vascular disease              | 0.83 | 0.66   | 1.03 | 0.093   |
| - Hypertension, uncomplicated              | 1.13 | 1.02   | 1.25 | 0.016   |
| - Hypertension, complicated                | 1.00 | 0.89   | 1.14 | 0.942   |
| - Paralysis                                | 1.59 | 1.27   | 2.00 | < 0.001 |
| - Neurologic disorders                     | 0.96 | 0.85   | 1.08 | 0.513   |
| - Chronic lung disease                     | 1.10 | 0.99   | 1.21 | 0.072   |
| - Diabetes mellitus, uncomplicated         | 0.82 | 0.72   | 0.93 | 0.003   |
| - Diabetes mellitus, complicated           | 1.30 | 1.17   | 1.44 | < 0.001 |
| - Hypothyroidism                           | 0.98 | 0.87   | 1.10 | 0.757   |
| - Renal failure                            | 0.86 | 0.75   | 0.98 | 0.026   |
| - Liver disease                            | 1.30 | 1.11   | 1.51 | 0.001   |
| - Peptic ulcer disease                     | 1.64 | 1.15   | 2.32 | 0.006   |
| - HIV / AIDS                               | 1.04 | 0.60   | 1.80 | 0.899   |
| - Lymphoma                                 | 1.07 | 0.74   | 1.56 | 0.703   |
| - Metastatic malignancy                    | 1.06 | 0.76   | 1.47 | 0.727   |
| - Solid tumor                              | 1.32 | 1.00   | 1.74 | 0.049   |
| - Rheumatoid arthritis / collagen-vascular | 1.22 | 0.98   | 1.52 | 0.068   |
| - Coagulopathy                             | 1.29 | 1.14   | 1.46 | < 0.001 |
| - Obesity                                  | 1.85 | 1.70   | 2.02 | < 0.001 |
| - Weight loss                              | 1.94 | 1.72   | 2.20 | < 0.001 |
| - Fluid and electrolyte disorders          | 1.34 | 1.24   | 1.44 | < 0.001 |
| - Blood loss anemia                        | 0.90 | 0.58   | 1.38 | 0.620   |
| - Deficiency anemia                        | 1.49 | 1.36   | 1.64 | 0.000   |
| - Alcohol abuse                            | 0.93 | 0.70   | 1.24 | 0.627   |
| - Substance use disorder                   | 1.27 | 1.01   | 1.61 | 0.041   |
| - Psychoses                                | 1.06 | 0.89   | 1.26 | 0.515   |
| - Depression                               | 1.00 | 0.87   | 1.14 | 0.985   |

\* All covariates included in the model are included in this table. Risk ratios are adjusted based on listed covariates.

**Supplemental Table 5. Patient and Hospital Characteristics Associated with In-Hospital Death or Discharge to Hospice**

|                                            | Model Evaluating Bacterial Co-infection |        |      |         | Model Evaluating Bacterial Secondary Infection |        |      |         |
|--------------------------------------------|-----------------------------------------|--------|------|---------|------------------------------------------------|--------|------|---------|
|                                            | aRR                                     | 95% CI |      | p-value | aRR                                            | 95% CI |      | p-value |
|                                            |                                         | LL     | UL   |         |                                                | LL     | UL   |         |
| <b>Bacterial co-infection</b>              | 1.15                                    | 1.11   | 1.20 | < 0.001 | 1.15                                           | 1.11   | 1.20 | < 0.001 |
| <b>Bacterial secondary infection</b>       |                                         |        |      |         | 1.93                                           | 1.82   | 2.04 | < 0.001 |
| Age                                        | 1.05                                    | 1.04   | 1.05 | < 0.001 | 1.05                                           | 1.04   | 1.05 | < 0.001 |
| Male                                       | 1.26                                    | 1.22   | 1.30 | < 0.001 | 1.26                                           | 1.22   | 1.30 | < 0.001 |
| Hospital Transfer                          | 1.39                                    | 1.25   | 1.54 | < 0.001 | 1.37                                           | 1.24   | 1.51 | < 0.001 |
| Admission from long-term care              | 1.20                                    | 1.14   | 1.27 | < 0.001 | 1.21                                           | 1.15   | 1.28 | < 0.001 |
| Black race                                 | 0.86                                    | 0.83   | 0.90 | < 0.001 | 0.87                                           | 0.83   | 0.90 | < 0.001 |
| Hispanic ethnicity                         | 0.92                                    | 0.85   | 1.00 | 0.044   | 0.92                                           | 0.85   | 1.00 | 0.041   |
| Urban hospital                             | 1.03                                    | 0.91   | 1.17 | 0.616   | 1.04                                           | 0.91   | 1.18 | 0.549   |
| Bed size category                          | 1.03                                    | 1.01   | 1.06 | 0.013   | 1.03                                           | 1.00   | 1.06 | 0.022   |
| Northeast region                           | 0.94                                    | 0.86   | 1.02 | 0.152   | 0.94                                           | 0.86   | 1.02 | 0.156   |
| % COVID-19 admissions                      | 1.01                                    | 1.00   | 1.01 | < 0.001 | 1.01                                           | 1.00   | 1.01 | < 0.001 |
| % Admissions with mechanical ventilation   | 1.01                                    | 1.01   | 1.02 | < 0.001 | 1.01                                           | 1.01   | 1.02 | < 0.001 |
| <i>Elixhauser Comorbidities:</i>           |                                         |        |      |         |                                                |        |      |         |
| - Valvular heart disease                   | 0.97                                    | 0.91   | 1.03 | 0.367   | 0.97                                           | 0.91   | 1.03 | 0.301   |
| - Pulmonary circulation disease            | 1.09                                    | 0.99   | 1.20 | 0.088   | 1.07                                           | 0.97   | 1.18 | 0.163   |
| - Peripheral vascular disease              | 1.02                                    | 0.96   | 1.08 | 0.526   | 1.02                                           | 0.97   | 1.08 | 0.429   |
| - Hypertension, uncomplicated              | 0.90                                    | 0.86   | 0.93 | < 0.001 | 0.89                                           | 0.86   | 0.93 | < 0.001 |
| - Hypertension, complicated                | 1.15                                    | 1.10   | 1.20 | < 0.001 | 1.14                                           | 1.10   | 1.19 | < 0.001 |
| - Paralysis                                | 1.49                                    | 1.38   | 1.60 | < 0.001 | 1.46                                           | 1.35   | 1.58 | < 0.001 |
| - Neurologic disorders                     | 1.20                                    | 1.16   | 1.25 | < 0.001 | 1.21                                           | 1.16   | 1.25 | < 0.001 |
| - Chronic lung disease                     | 1.05                                    | 1.02   | 1.09 | 0.002   | 1.05                                           | 1.02   | 1.09 | 0.002   |
| - Diabetes mellitus, uncomplicated         | 0.99                                    | 0.94   | 1.04 | 0.734   | 1.00                                           | 0.95   | 1.05 | 0.999   |
| - Diabetes mellitus, complicated           | 1.15                                    | 1.12   | 1.19 | < 0.001 | 1.15                                           | 1.11   | 1.18 | < 0.001 |
| - Hypothyroidism                           | 1.03                                    | 0.99   | 1.06 | 0.121   | 1.03                                           | 0.99   | 1.06 | 0.100   |
| - Renal failure                            | 1.10                                    | 1.05   | 1.15 | < 0.001 | 1.10                                           | 1.05   | 1.15 | < 0.001 |
| - Liver disease                            | 1.15                                    | 1.08   | 1.24 | < 0.001 | 1.15                                           | 1.07   | 1.23 | < 0.001 |
| - Peptic ulcer disease                     | 0.83                                    | 0.68   | 1.02 | 0.081   | 0.80                                           | 0.65   | 0.99 | 0.039   |
| - HIV / AIDS                               | 1.14                                    | 0.90   | 1.45 | 0.279   | 1.13                                           | 0.89   | 1.45 | 0.317   |
| - Lymphoma                                 | 1.35                                    | 1.18   | 1.54 | < 0.001 | 1.35                                           | 1.19   | 1.54 | < 0.001 |
| - Metastatic malignancy                    | 1.68                                    | 1.54   | 1.83 | < 0.001 | 1.66                                           | 1.52   | 1.80 | < 0.001 |
| - Solid tumor                              | 1.14                                    | 1.05   | 1.25 | 0.003   | 1.14                                           | 1.04   | 1.24 | 0.005   |
| - Rheumatoid arthritis / collagen-vascular | 1.10                                    | 1.01   | 1.18 | 0.022   | 1.08                                           | 1.00   | 1.17 | 0.045   |
| - Coagulopathy                             | 1.23                                    | 1.18   | 1.29 | < 0.001 | 1.21                                           | 1.16   | 1.27 | < 0.001 |
| - Obesity                                  | 1.22                                    | 1.15   | 1.29 | < 0.001 | 1.19                                           | 1.13   | 1.26 | < 0.001 |
| - Weight loss                              | 1.16                                    | 1.09   | 1.25 | < 0.001 | 1.13                                           | 1.06   | 1.21 | < 0.001 |
| - Fluid and electrolyte disorders          | 1.41                                    | 1.34   | 1.48 | < 0.001 | 1.40                                           | 1.33   | 1.47 | < 0.001 |
| - Blood loss anemia                        | 0.87                                    | 0.70   | 1.09 | 0.230   | 0.87                                           | 0.70   | 1.08 | 0.218   |
| - Deficiency anemia                        | 1.01                                    | 0.97   | 1.05 | 0.743   | 0.99                                           | 0.96   | 1.03 | 0.766   |
| - Alcohol abuse                            | 1.00                                    | 0.90   | 1.11 | 0.987   | 1.01                                           | 0.91   | 1.12 | 0.879   |
| - Substance use disorder                   | 0.76                                    | 0.66   | 0.88 | < 0.001 | 0.75                                           | 0.65   | 0.86 | < 0.001 |
| - Psychoses                                | 1.14                                    | 1.07   | 1.21 | < 0.001 | 1.14                                           | 1.07   | 1.21 | < 0.001 |
| - Depression                               | 0.95                                    | 0.90   | 1.00 | 0.031   | 0.95                                           | 0.91   | 1.00 | 0.036   |

\* All covariates included in the model are included in this table. Risk ratios are adjusted listed covariates.

**Supplemental Table 6. Factors Associated with Bacterial Secondary Infection after Immunosuppression on or Before Hospital Day 2**

|                                            | Model with Steroids Only |        |      |         | Model with Tocilizumab Only |        |      |         |
|--------------------------------------------|--------------------------|--------|------|---------|-----------------------------|--------|------|---------|
|                                            | aRR*                     | 95% CI |      | p-value | aRR*                        | 95% CI |      | p-value |
|                                            |                          | LL     | UL   |         |                             | LL     | UL   |         |
| <b>Corticosteroids by Hospital Day 2</b>   | 1.65                     | 1.48   | 1.85 | < 0.001 |                             |        |      |         |
| <b>Tocilizumab by Hospital Day 2</b>       |                          |        |      |         | 2.66                        | 2.14   | 3.33 | < 0.001 |
| Age                                        | 1.00                     | 1.48   | 1.84 | 0.010   | 1.00                        | 1.00   | 1.01 | 0.016   |
| Male                                       | 1.16                     | 1.00   | 1.01 | < 0.001 | 1.16                        | 1.07   | 1.26 | < 0.001 |
| Hospital Transfer                          | 1.63                     | 1.07   | 1.25 | < 0.001 | 1.64                        | 1.37   | 1.96 | < 0.001 |
| Admission from long-term care              | 0.76                     | 1.37   | 1.94 | 0.017   | 0.76                        | 0.60   | 0.95 | 0.018   |
| Black race                                 | 0.89                     | 0.60   | 0.95 | 0.031   | 0.88                        | 0.80   | 0.98 | 0.017   |
| Hispanic ethnicity                         | 1.11                     | 0.81   | 0.99 | 0.063   | 1.11                        | 0.99   | 1.23 | 0.067   |
| Urban hospital                             | 0.84                     | 0.99   | 1.24 | 0.125   | 0.85                        | 0.67   | 1.08 | 0.178   |
| Bed size category                          | 1.11                     | 0.66   | 1.05 | < 0.001 | 1.10                        | 1.06   | 1.15 | < 0.001 |
| Northeast region                           | 1.06                     | 1.07   | 1.16 | 0.559   | 1.06                        | 0.88   | 1.26 | 0.542   |
| % COVID-19 admissions                      | 1.00                     | 0.88   | 1.26 | 0.089   | 1.00                        | 0.99   | 1.00 | 0.124   |
| % Admissions w. mechanical ventilation     | 1.06                     | 0.99   | 1.00 | < 0.001 | 1.06                        | 1.05   | 1.07 | < 0.001 |
| <i>Elixhauser Comorbidities:</i>           |                          |        |      |         |                             |        |      |         |
| - Valvular heart disease                   | 1.12                     | 0.90   | 1.38 | 0.306   | 1.12                        | 0.91   | 1.38 | 0.298   |
| - Pulmonary circulation disease            | 0.98                     | 0.76   | 1.27 | 0.879   | 0.97                        | 0.75   | 1.25 | 0.808   |
| - Peripheral vascular disease              | 0.83                     | 0.66   | 1.04 | 0.107   | 0.84                        | 0.67   | 1.04 | 0.113   |
| - Hypertension, uncomplicated              | 1.13                     | 1.02   | 1.24 | 0.018   | 1.13                        | 1.02   | 1.24 | 0.019   |
| - Hypertension, complicated                | 1.00                     | 0.88   | 1.13 | 0.992   | 1.01                        | 0.89   | 1.14 | 0.891   |
| - Paralysis                                | 1.59                     | 1.27   | 2.00 | 0.000   | 1.59                        | 1.27   | 2.00 | < 0.001 |
| - Neurologic disorders                     | 0.98                     | 0.87   | 1.11 | 0.759   | 0.97                        | 0.86   | 1.10 | 0.639   |
| - Chronic lung disease                     | 1.02                     | 0.92   | 1.12 | 0.719   | 1.10                        | 0.99   | 1.21 | 0.071   |
| - Diabetes mellitus, uncomplicated         | 0.83                     | 0.73   | 0.95 | 0.007   | 0.82                        | 0.72   | 0.93 | 0.003   |
| - Diabetes mellitus, complicated           | 1.29                     | 1.16   | 1.43 | < 0.001 | 1.30                        | 1.17   | 1.44 | < 0.001 |
| - Hypothyroidism                           | 0.97                     | 0.87   | 1.10 | 0.667   | 0.98                        | 0.87   | 1.11 | 0.785   |
| - Renal failure                            | 0.87                     | 0.76   | 0.99 | 0.038   | 0.86                        | 0.75   | 0.98 | 0.028   |
| - Liver disease                            | 1.30                     | 1.11   | 1.52 | 0.001   | 1.30                        | 1.12   | 1.52 | 0.001   |
| - Peptic ulcer disease                     | 1.67                     | 1.17   | 2.39 | 0.005   | 1.62                        | 1.15   | 2.30 | 0.006   |
| - HIV / AIDS                               | 1.03                     | 0.59   | 1.79 | 0.911   | 1.03                        | 0.60   | 1.78 | 0.921   |
| - Lymphoma                                 | 1.07                     | 0.74   | 1.53 | 0.734   | 1.07                        | 0.74   | 1.54 | 0.734   |
| - Metastatic malignancy                    | 1.05                     | 0.75   | 1.45 | 0.783   | 1.09                        | 0.78   | 1.51 | 0.622   |
| - Solid tumor                              | 1.31                     | 0.99   | 1.73 | 0.063   | 1.32                        | 1.00   | 1.74 | 0.048   |
| - Rheumatoid arthritis / collagen-vascular | 1.10                     | 0.88   | 1.37 | 0.425   | 1.22                        | 0.98   | 1.52 | 0.071   |
| - Coagulopathy                             | 1.27                     | 1.13   | 1.44 | < 0.001 | 1.28                        | 1.14   | 1.45 | < 0.001 |
| - Obesity                                  | 1.82                     | 1.67   | 1.99 | < 0.001 | 1.83                        | 1.67   | 2.00 | < 0.001 |
| - Weight loss                              | 1.95                     | 1.72   | 2.20 | < 0.001 | 1.96                        | 1.73   | 2.21 | < 0.001 |
| - Fluid and electrolyte disorders          | 1.31                     | 1.22   | 1.41 | < 0.001 | 1.33                        | 1.23   | 1.43 | < 0.001 |
| - Blood loss anemia                        | 0.91                     | 0.59   | 1.40 | 0.680   | 0.93                        | 0.60   | 1.42 | 0.726   |
| - Deficiency anemia                        | 1.49                     | 1.36   | 1.64 | < 0.001 | 1.49                        | 1.36   | 1.64 | < 0.001 |
| - Alcohol abuse                            | 0.95                     | 0.71   | 1.26 | 0.717   | 0.93                        | 0.71   | 1.24 | 0.640   |
| - Substance use disorder                   | 1.29                     | 1.02   | 1.63 | 0.031   | 1.30                        | 1.03   | 1.65 | 0.025   |
| - Psychoses                                | 1.07                     | 0.91   | 1.27 | 0.401   | 1.06                        | 0.90   | 1.26 | 0.490   |
| - Depression                               | 1.00                     | 0.88   | 1.14 | 0.996   | 1.01                        | 0.88   | 1.15 | 0.919   |

\* All covariates included in the model are included in this table. Risk ratios are adjusted based on listed covariates.

**Supplemental Table 7. Factors Associated with Bacterial Secondary Infection after Immunosuppression by Hospital Day 2, including both Steroids and Tocilizumab**

|                                                       | aRR* | 95% CI |      | p-value |
|-------------------------------------------------------|------|--------|------|---------|
|                                                       |      | LL     | UL   |         |
| <b>Corticosteroids by Hospital Day 2</b>              | 1.60 | 1.42   | 1.81 | < 0.001 |
| <b>Tocilizumab by Hospital Day 2</b>                  | 2.74 | 2.11   | 3.57 | < 0.001 |
| <b>Interaction Early Steroids * Early Tocilizumab</b> | 0.74 | 0.54   | 1.02 | 0.069   |
| Age                                                   | 1.00 | 1.00   | 1.01 | 0.007   |
| Male                                                  | 1.14 | 1.06   | 1.24 | 0.001   |
| Hospital Transfer                                     | 1.61 | 1.35   | 1.90 | < 0.001 |
| Admission from long-term care                         | 0.76 | 0.60   | 0.95 | 0.018   |
| Black race                                            | 0.90 | 0.81   | 0.99 | 0.033   |
| Hispanic ethnicity                                    | 1.10 | 0.98   | 1.23 | 0.080   |
| Urban hospital                                        | 0.85 | 0.67   | 1.07 | 0.166   |
| Bed size category                                     | 1.11 | 1.06   | 1.16 | < 0.001 |
| Northeast region                                      | 1.05 | 0.87   | 1.25 | 0.572   |
| % COVID-19 admissions                                 | 1.00 | 0.99   | 1.00 | 0.091   |
| % Admissions with mechanical ventilation              | 1.06 | 1.05   | 1.07 | < 0.001 |
| <i>Elixhauser Comorbidities:</i>                      |      |        |      |         |
| - Valvular heart disease                              | 1.12 | 0.91   | 1.38 | 0.288   |
| - Pulmonary circulation disease                       | 0.97 | 0.75   | 1.25 | 0.802   |
| - Peripheral vascular disease                         | 0.84 | 0.67   | 1.05 | 0.125   |
| - Hypertension, uncomplicated                         | 1.12 | 1.02   | 1.24 | 0.021   |
| - Hypertension, complicated                           | 1.00 | 0.89   | 1.14 | 0.943   |
| - Paralysis                                           | 1.59 | 1.27   | 2.00 | < 0.001 |
| - Neurologic disorders                                | 0.99 | 0.88   | 1.12 | 0.865   |
| - Chronic lung disease                                | 1.03 | 0.93   | 1.13 | 0.628   |
| - Diabetes mellitus, uncomplicated                    | 0.83 | 0.73   | 0.95 | 0.005   |
| - Diabetes mellitus, complicated                      | 1.29 | 1.16   | 1.43 | < 0.001 |
| - Hypothyroidism                                      | 0.98 | 0.87   | 1.10 | 0.697   |
| - Renal failure                                       | 0.87 | 0.76   | 0.99 | 0.039   |
| - Liver disease                                       | 1.30 | 1.12   | 1.53 | 0.001   |
| - Peptic ulcer disease                                | 1.66 | 1.16   | 2.37 | 0.005   |
| - HIV / AIDS                                          | 1.03 | 0.59   | 1.77 | 0.928   |
| - Lymphoma                                            | 1.06 | 0.74   | 1.52 | 0.755   |
| - Metastatic malignancy                               | 1.07 | 0.77   | 1.48 | 0.680   |
| - Solid tumor                                         | 1.31 | 0.99   | 1.73 | 0.063   |
| - Rheumatoid arthritis / collagen-vascular            | 1.11 | 0.88   | 1.38 | 0.382   |
| - Coagulopathy                                        | 1.27 | 1.12   | 1.43 | < 0.001 |
| - Obesity                                             | 1.80 | 1.65   | 1.97 | < 0.001 |
| - Weight loss                                         | 1.96 | 1.74   | 2.21 | < 0.001 |
| - Fluid and electrolyte disorders                     | 1.30 | 1.21   | 1.40 | < 0.001 |
| - Blood loss anemia                                   | 0.94 | 0.61   | 1.44 | 0.774   |
| - Deficiency anemia                                   | 1.49 | 1.36   | 1.64 | < 0.001 |
| - Alcohol abuse                                       | 0.95 | 0.72   | 1.26 | 0.722   |
| - Substance use disorder                              | 1.32 | 1.04   | 1.66 | 0.020   |
| - Psychoses                                           | 1.08 | 0.91   | 1.27 | 0.390   |
| - Depression                                          | 1.01 | 0.88   | 1.15 | 0.913   |

\* All covariates included in the model are included in this table. Risk ratios are adjusted based on listed covariates.
